# Supplementary material for: Synthesis, Computational and Nanoencapsulation Studies on Eugenol-Derived Insecticides
Source: Preprints.org preprint supplement (doi:10.20944/preprints202203.0354.v1), 2022-03-28

# Supplementary Material

## **Synthesis, computational and nanoencapsulation studies on eugenol-derived insecticides**

**Catarina M. M. Coelho<sup>a</sup>, Renato B. Pereira<sup>b</sup>, Tatiana F. Vieira<sup>c,d</sup>, Cláudia M. Teixeira<sup>a,b</sup>,  
Maria José G. Fernandes<sup>a</sup>, Ana Rita O. Rodrigues<sup>e,f</sup>, David M. Pereira<sup>b</sup>, Sérgio F. Sousa<sup>c,d</sup>, A.**

**Gil Fortes<sup>a</sup>, Elisabete M. S. Castanheira<sup>e</sup> and M. Sameiro T. Gonçalves<sup>a,\*</sup>**

<sup>a</sup> *Centre of Chemistry, Department of Chemistry, University of Minho, Campus of Gualtar, 4710-057 Braga, Portugal;*

<sup>b</sup> *REQUIMTE/LAQV, Laboratory of Pharmacognosy, Department of Chemistry, Faculty of Pharmacy, University of Porto, R. Jorge Viterbo Ferreira, 228, 4050-313 Porto, Portugal;*

<sup>c</sup> *UCIBIO/REQUIMTE, BioSIM – Departamento de Medicina, Faculdade de Medicina da Universidade Do Porto, Alameda Prof. Hernâni Monteiro, 4200-319 Porto, Portugal;*

<sup>d</sup> *Associate Laboratory i4HB - Institute for Health and Bioeconomy, Faculdade de Medicina, Universidade do Porto, 4200-319 Porto, Portugal;*

<sup>e</sup> *Physics Centre of Minho and Porto Universities (CF-UM-UP), University of Minho, Campus of Gualtar, 4710-057 Braga, Portugal;*

<sup>f</sup> *Associate Laboratory LaPMET - Laboratory of Physics for Materials and Emergent Technologies, University of Minho, Campus of Gualtar, 4710-057 Braga, Portugal.*

**Table S1.** Targets selected for the inverted virtual screening assay

| Target                                                             | Organism                       | PDB target | Resolution (Å) | Description                                                                                                                                                                                                                     | Ref |
|--------------------------------------------------------------------|--------------------------------|------------|----------------|---------------------------------------------------------------------------------------------------------------------------------------------------------------------------------------------------------------------------------|-----|
| Ecdysone receptor                                                  | <i>Heliothis virescens</i>     | 1R20       | 3.00           | VS based on 1R20 bound to an agonist as a model for the development of a receptor-based pharmacophore model.                                                                                                                    | 1   |
|                                                                    |                                | 1R1K       | 2.90           | VS of 2 million compounds against 1R1K, an ecdysone receptor structure bound to its known ligand ponasterone A.                                                                                                                 | 2   |
| Chitinase                                                          | <i>Ostrinia furnacalis</i>     | 3WL1       | 1.77           | Pharmacophore-based screening using two crystal structures of chitinases: 3WL1 bound to its reaction product and 3WQV bound to an inhibitor.                                                                                    | 3   |
| 3WQV                                                               |                                | 2.04       |                |                                                                                                                                                                                                                                 |     |
| beta- <i>N</i> -Acetyl-D-hexosaminidase OfHex1                     |                                | 3NSN       | 2.10           | VS of the ZINC database to identify OfHex1 inhibitors using 3NSN crystal structure bound to a known inhibitor.                                                                                                                  | 4   |
|                                                                    |                                | 3OZP       | 2.00           | VS of the ZINC data-base targeting 3OZP, a crystal structure of OfHex1 bound to an inhibitor.                                                                                                                                   | 5   |
| <i>N</i> -Acetylglucosamine-1-phosphate uridylyltransferase (GlmU) | <i>Xanthomonas oryzae</i>      | 2V0K       | 2.30           | Homology model built for docking using 2V0K and 2VD4 as templates. 2V0K crystal structure is bound to its known ligand and 2VD4 is bound to a possible inhibitor.                                                               | 6   |
|                                                                    |                                | 2VD4       | 1.90           |                                                                                                                                                                                                                                 |     |
| Acetylcholinesterase                                               | <i>Aedes aegypti</i>           | 1QON       | 2.72           | Search for new molecules with insecticidal activity against <i>Ae. Aegypti</i> using acetylcholinesterase crystal structures 1QON and 4EY6 as targets, both bound to possible inhibitors.                                       | 7   |
|                                                                    |                                | 4EY6       | 2.40           |                                                                                                                                                                                                                                 |     |
|                                                                    | <i>Drosophila melanogaster</i> | 1DX4       | 2.70           | Homology 3D model built for VS using 1DX4 as template. 1DX4 crystal structure is bound to a potent inhibitor.                                                                                                                   | 8   |
| Prophenoloxidase (PPO)                                             | <i>Manduca sexta</i>           | 3HSS       | 1.97           | Crystal structure of a prophenoloxidase from <i>Manduca sexta</i> .                                                                                                                                                             | 9   |
| <i>p</i> -Hydroxyphenylpyruvate dioxygenase                        | <i>Arabidopsis thaliana</i>    | 6ISD       | 2.40           | Development of a receptor-ligand pharmacophore model based on the crystal structure 6ISD bound to a commonly used pesticide. The best model created was then used for VS studies.                                               | 10  |
| Voltage-gated sodium channel                                       | <i>Periplaneta americana</i>   | 6A95       | 2.60           | Crystallographic structure of a Voltage-gated sodium channel NavPaS bound to a pore blocker, tetrodotoxin (TTX)                                                                                                                 | 11  |
| Octopamine receptor                                                | <i>Blattella germanica</i>     | 4N7C       | 1.75           | Crystal structure of Bla g 4, an octopamine receptor, bound to tyramine.                                                                                                                                                        | 12  |
| Sterol carrier protein-2 (HaSCP-2)                                 | <i>Helicoverpa armigera</i>    | 4UEI       | Solution NMR   | Structure-based VS of a database of commercially available compounds to find potential inhibitors of HaSCP-2. The residues Phe53, Thr128, and Gln131 were selected for the binding cavity.                                      | 13  |
| Peptide deformylase                                                | <i>Xanthomonas oryzae</i>      | 5CY8       | 2.38           | Docking and VS of a library of 318 phytochemicals. 5CY8 crystal structure is bound to a possible inhibitor.                                                                                                                     | 14  |
| Alpha-esterase-7 (αE7)                                             | <i>Lucilia cuprina</i>         | 5TYJ       | 1.75           | Computational design of potent and selective covalent inhibitors of αE7. 5TYJ and 5TYP crystal structures are bound to inhibitors: (3-bromo-5-phenoxyphenyl)boronic acid and (3-bromo-4-methylphenyl)boronic acid respectively. | 15  |
|                                                                    |                                | 5TYP       | 1.88           |                                                                                                                                                                                                                                 |     |
| Odorant Binding Protein                                            | <i>Aedes aegypti</i>           | 5V13       | 1.84           | Search for new molecules with insecticidal activity against <i>Ae. Aegypti</i> using a crystal structure of a mosquito juvenile hormone-binding protein, 5V13 bound to its natural hormone.                                     | 7   |
|                                                                    | <i>Drosophila melanogaster</i> | 2GTE       | 1.40           | 2GTE crystal structure is bound to its natural ligand                                                                                                                                                                           | 16  |
|                                                                    | <i>Anopheles gambiae</i>       | 3N7H       | 1.60           | QSAR and docking studies for the rational design of mosquito repellents using the crystal structure 3K1E bound to a polyethylene glycol molecule. 3N7H crystal structure is bound to a commonly used repellent.                 | 17  |
|                                                                    | <i>Aedes aegypti</i>           | 3K1E       | 1.85           |                                                                                                                                                                                                                                 | 17  |

### *Creation of a homology model*

The model generated by SWISS-MODEL for 1QON was used in the MD simulations since the gap that was missing from the original structure was distant from the active site.

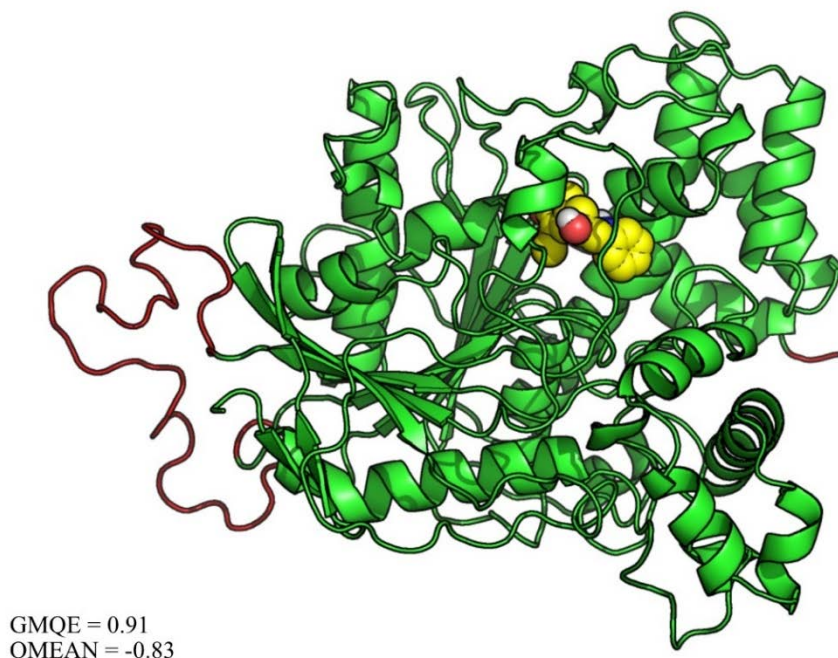

**Figure S1.** Homology model built for 1QON. Green is the original structure and red represents the loop that was generated by SWISS-MODEL. In yellow is the ligand molecule (NP34). GMQE - Global Model Quality Estimation, is expressed between 0 and 1 with a higher number meaning higher reliability. QMEAN - provides an estimate of the "degree of nativeness" of the structural features observed in the model. A value of QMEAN around zero indicate a good agreement between the model and experimental structure.

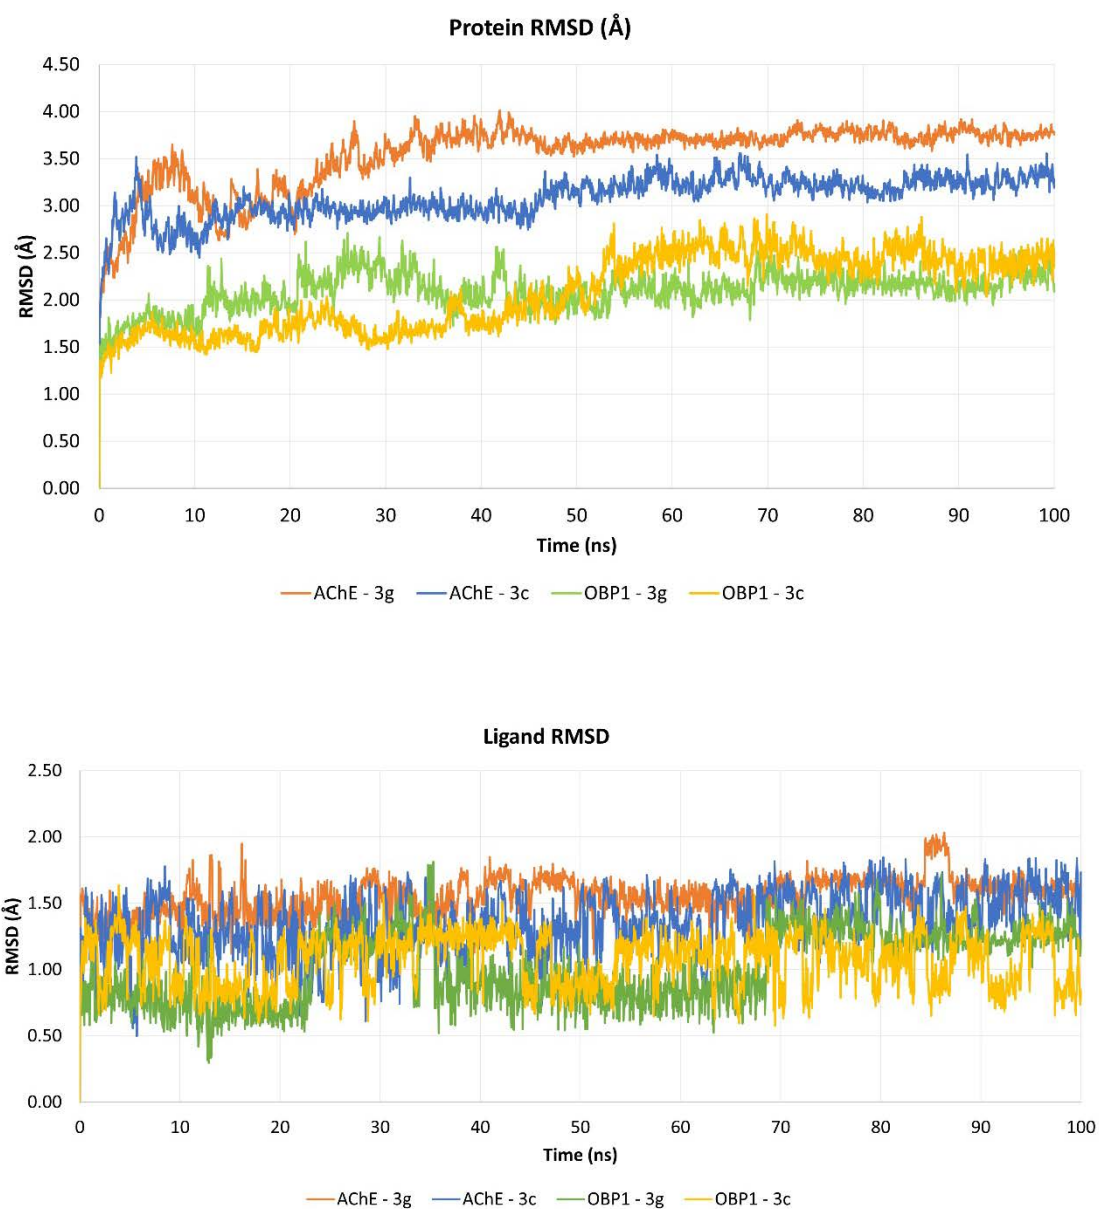

**Figure S2.** Protein and ligand RMSD (Å) of the AChE and OBP – ligand complexes.

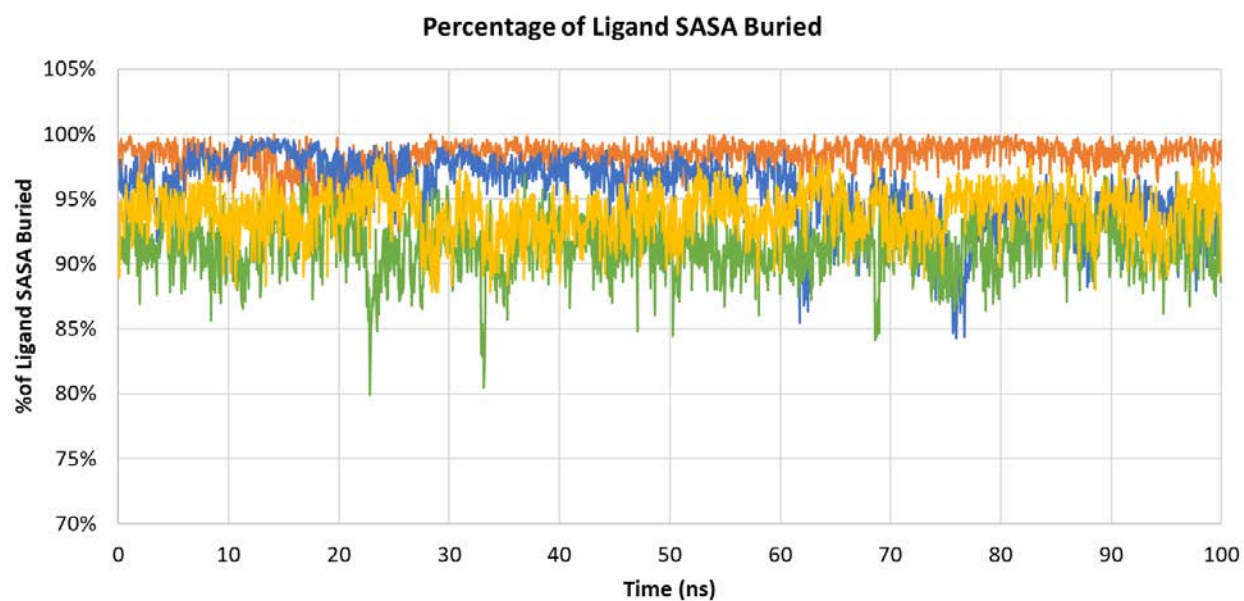

**Figure S3.** Percentage of the potential solvent accessible surface area of the ligands that is buried by the protein targets evaluated.

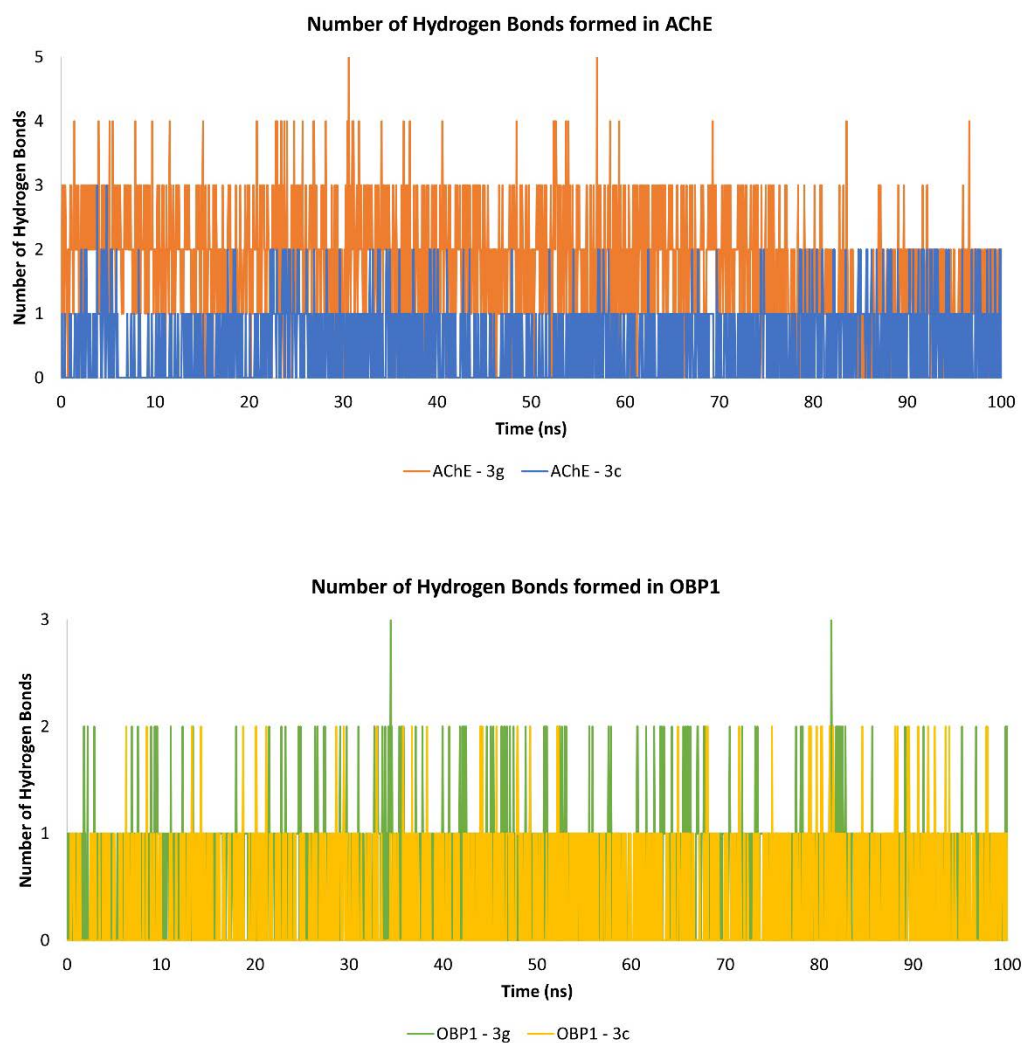

**Figure S4.** Number of ligand-target hydrogen bonds formed during the simulations for compound **3d** and **3f** when complexed with AchE and OBP.

**Table S2.** Docking scores for Compound **3c** and **3g** in complex with Human and insect AChE.

|             |    | PLP   | ASP   | ChemScore | GoldScore | Vina |
|-------------|----|-------|-------|-----------|-----------|------|
| Human       | 3c | 69.19 | 45.37 | 35.79     | 55.49     | -7.3 |
| AChE        |    |       |       |           |           |      |
| Insect AChE | 3c | 72.89 | 51.12 | 32.77     | 59.90     | -7.5 |
| Human       | 3g | 82.93 | 54.23 | 39.29     | 65.03     | -8.5 |
| AChE        |    |       |       |           |           |      |
| Insect AChE | 3g | 96.52 | 60.47 | 39.41     | 69.58     | -9.0 |

## References

- (1) Hu, X.; Yin, B.; Cappelle, K.; et al. Identification of novel agonists and antagonists of the ecdysone receptor by virtual screening, *J. Mol. Graph Model.* **2018**, 81, 77-85.
- (2) Harada, T.; Nakagawa, Y.; Ogura, T.; Yamada, Y.; Ohe, T.; Miyagawa, H. Virtual Screening for Ligands of the Insect Molting Hormone Receptor, *J. Chem. Inf. Model.* **2011**, 51(2), 296-305.
- (3) Dong, Y.; Jiang, X.; Liu, T.; et al. Structure-Based Virtual Screening, Compound Synthesis, and Bioassay for the Design of Chitinase Inhibitors, *J. Agric. Food Chem.* **2018**, 66, 3351-3357.
- (4) Liu, J.; Liu, M.; Yao, Y.; et al. Identification of Novel Potential  $\beta$ -N-Acetyl-D-Hexosaminidase Inhibitors by Virtual Screening, Molecular Dynamics Simulation and MM-PBSA Calculations. *Int. J. Mol. Sci.* **2012**, 13, 4545-4563.
- (5) Dong, L.; Shen, S.; Xu, Y.; et al. Identification of novel insect  $\beta$ -N-acetylhexosaminidase OfHex1 inhibitors based on virtual screening, biological evaluation, and molecular dynamics simulation. *J. Biomol. Struct. Dyn.* **2021**, 39, 1735-1743.
- (6) Min, J.; Lin, D.; Zhang, Q.; Zhang, J.; Yu, Z; Structure-based virtual screening of novel inhibitors of the uridyltransferase activity of *Xanthomonas oryzae* pv. *oryzae* GlmU. *Eur. J. Med. Chem.* **2012**, 53, 150-158.
- (7) Ramos, R.; Costa, J.; Silva, R.; et al. Identification of Potential Inhibitors from Pyriproxyfen with Insecticidal Activity by Virtual Screening. *Pharmaceuticals* **2019**, 12, 20.
- (8) Riva, C.; Suzanne, P.; Charpentier, G.; Dulin, F.; Halm-Lemeille, M.-P.; Sopkova-de Oliveira Santos, J. In silico chemical library screening and experimental validation of novel compounds with potential varroacide activities, *Pestic. Biochem. Physiol.* **2019**, 160, 11-19.
- (9) Li, Y.; Wang, Y.; Jiang, H.; Deng, J. Crystal structure of *Manduca sexta* prophenoloxidase provides insights into the mechanism of type 3 copper enzymes, *Proc. Natl. Acad. Sci.* **2009**, 106, 17002-17006.

- (10) Fu, Y.; Liu, Y.-X.; Kang, T.; Sun, Y.-N.; Li, J.-Z.; Ye, F. Identification of novel inhibitors of p-hydroxyphenylpyruvate dioxygenase using receptor-based virtual screening, *J. Taiwan Inst. Chem. Eng.* **2019**, 103, 33-43.
- (11) Shen, H.; Li, Z.; Jiang, Y.; et al. Structural basis for the modulation of voltage-gated sodium channels by animal toxins, *Science* **2018**, 362(6412), 1-8.
- (12) Offermann, L.R.; Chan, S.L.; Osinski, T.; Tan, Y.W.; Chew, F.T.; Sivaraman, J.; Mok, Y.-K.; Minor, W.; Chruszcz, M. The major cockroach allergen Bla g 4 binds tyramine and octopamine, *Mol. Immunol.* **2014**, 60, 86-94.
- (13) Cai, J.; Du, X.; Wang, C.; Lin, J.; Du, X. Identification of Potential *Helicoverpa armigera* (Lepidoptera: Noctuidae) Sterol Carrier Protein-2 Inhibitors Through High-Throughput Virtual Screening, *J. Econ. Entomol.* **2017**, 110, 1779-1784.
- (14) Joshi, T.; Joshi, T.; Sharma, P.; Chandra, S.; Pande, V. Molecular docking and molecular dynamics simulation approach to screen natural compounds for inhibition of *Xanthomonas oryzae* pv. *Oryzae* by targeting peptide deformylase. *J. Biomol. Struct. Dyn.* **2021**, 39, 823-840.
- (15) Correy, G. J.; Zaidman, D.; Harmelin, A.; et al. Overcoming insecticide resistance through computational inhibitor design. *Proc. Natl. Acad. Sci.* **2019**, 116, 21012-21021.
- (16) Laughlin, J.D.; Ha, T.S.; Jones, D.N.M.; Smith, D.P. Activation of Pheromone-Sensitive Neurons Is Mediated by Conformational Activation of Pheromone-Binding Protein, *Cell* **2008**, 13, 1255-1265.
- (17) Oliferenko, P.V.; Oliferenko, A.A.; Poda, G.I.; et al. Promising *Aedes aegypti* Repellent Chemotypes Identified through Integrated QSAR, Virtual Screening, Synthesis, and Bioassay. Oliveira, P.L. Editor, *PLoS One*, **2013**, 8, e64547.



<sup>1</sup>H and <sup>13</sup>C NMR spectra of compounds **3a-g**

<sup>1</sup>H NMR spectra of compounds **3a-g** are shown. These spectra confirm the corresponding structure and purity of each compound. In addition, <sup>13</sup>C spectra are also shown. This information serves as the statement for confirming the purity (≥95%) of the compounds synthesized in the reported work.

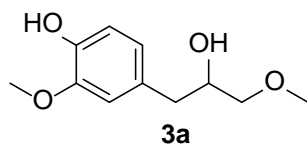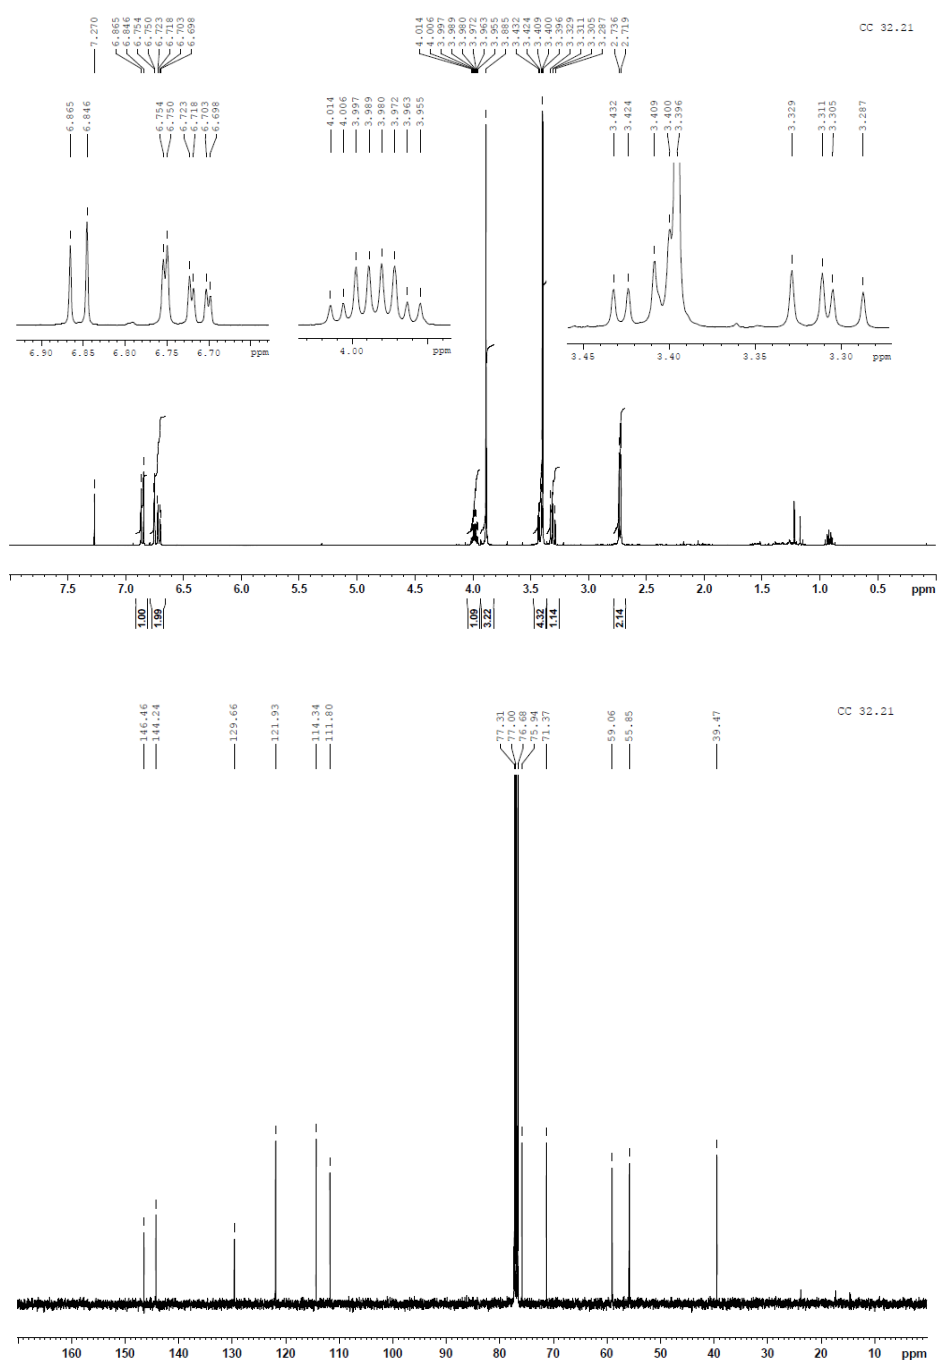

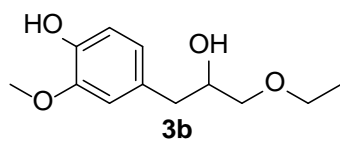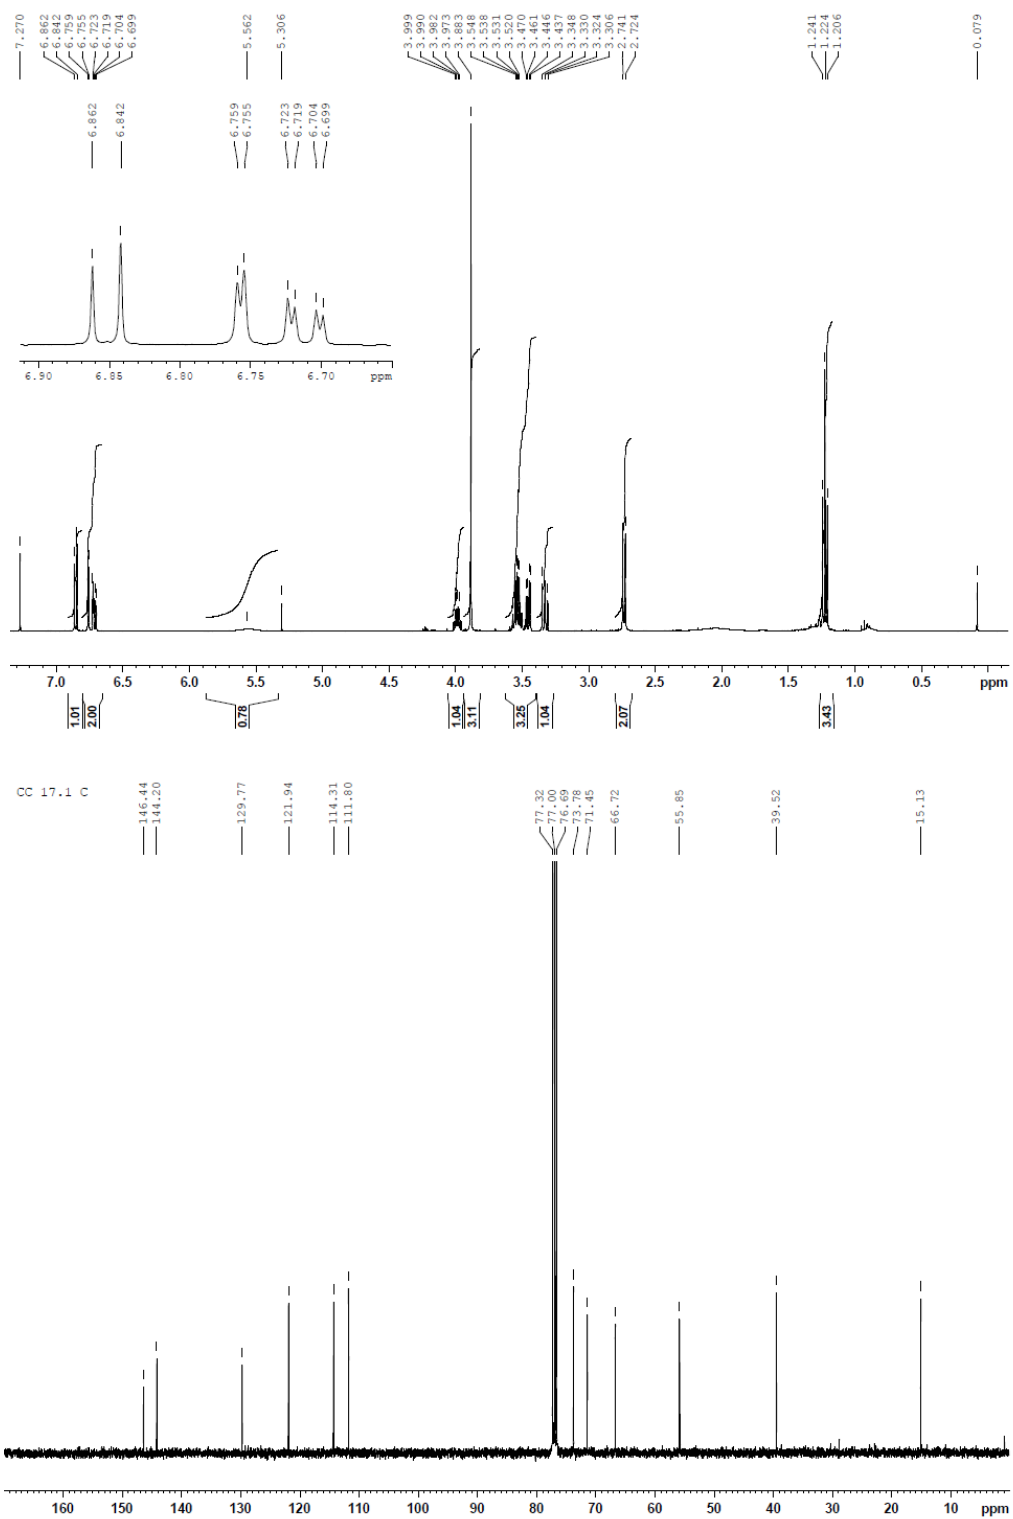

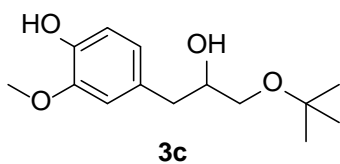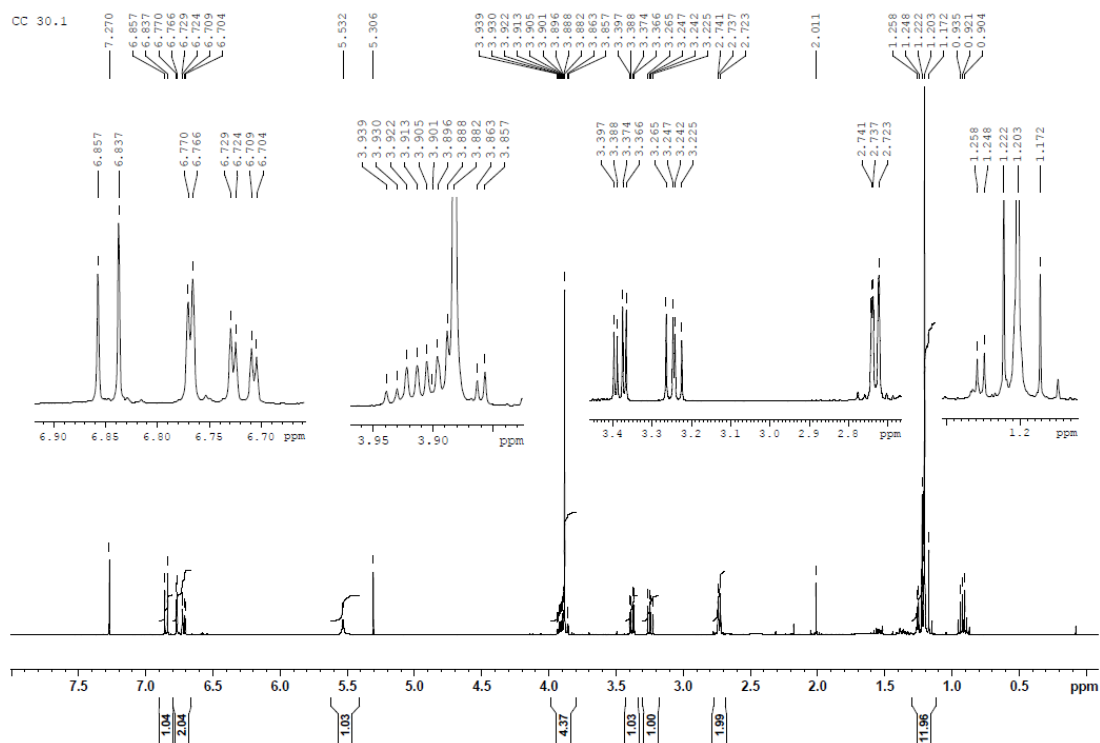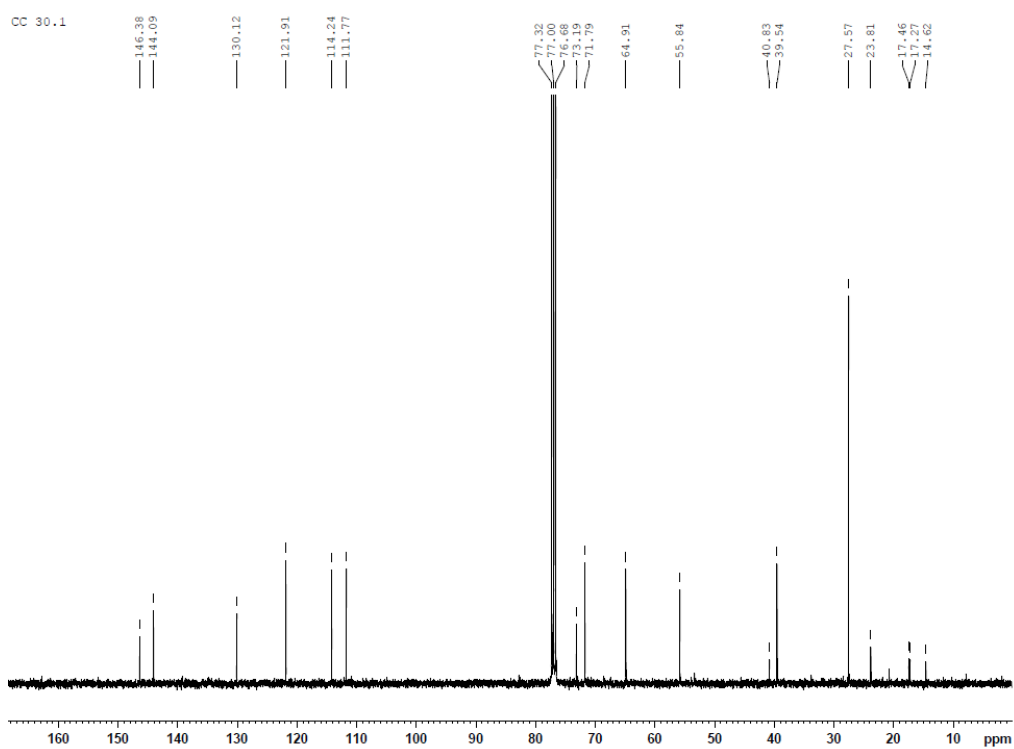

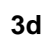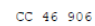

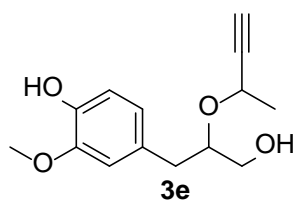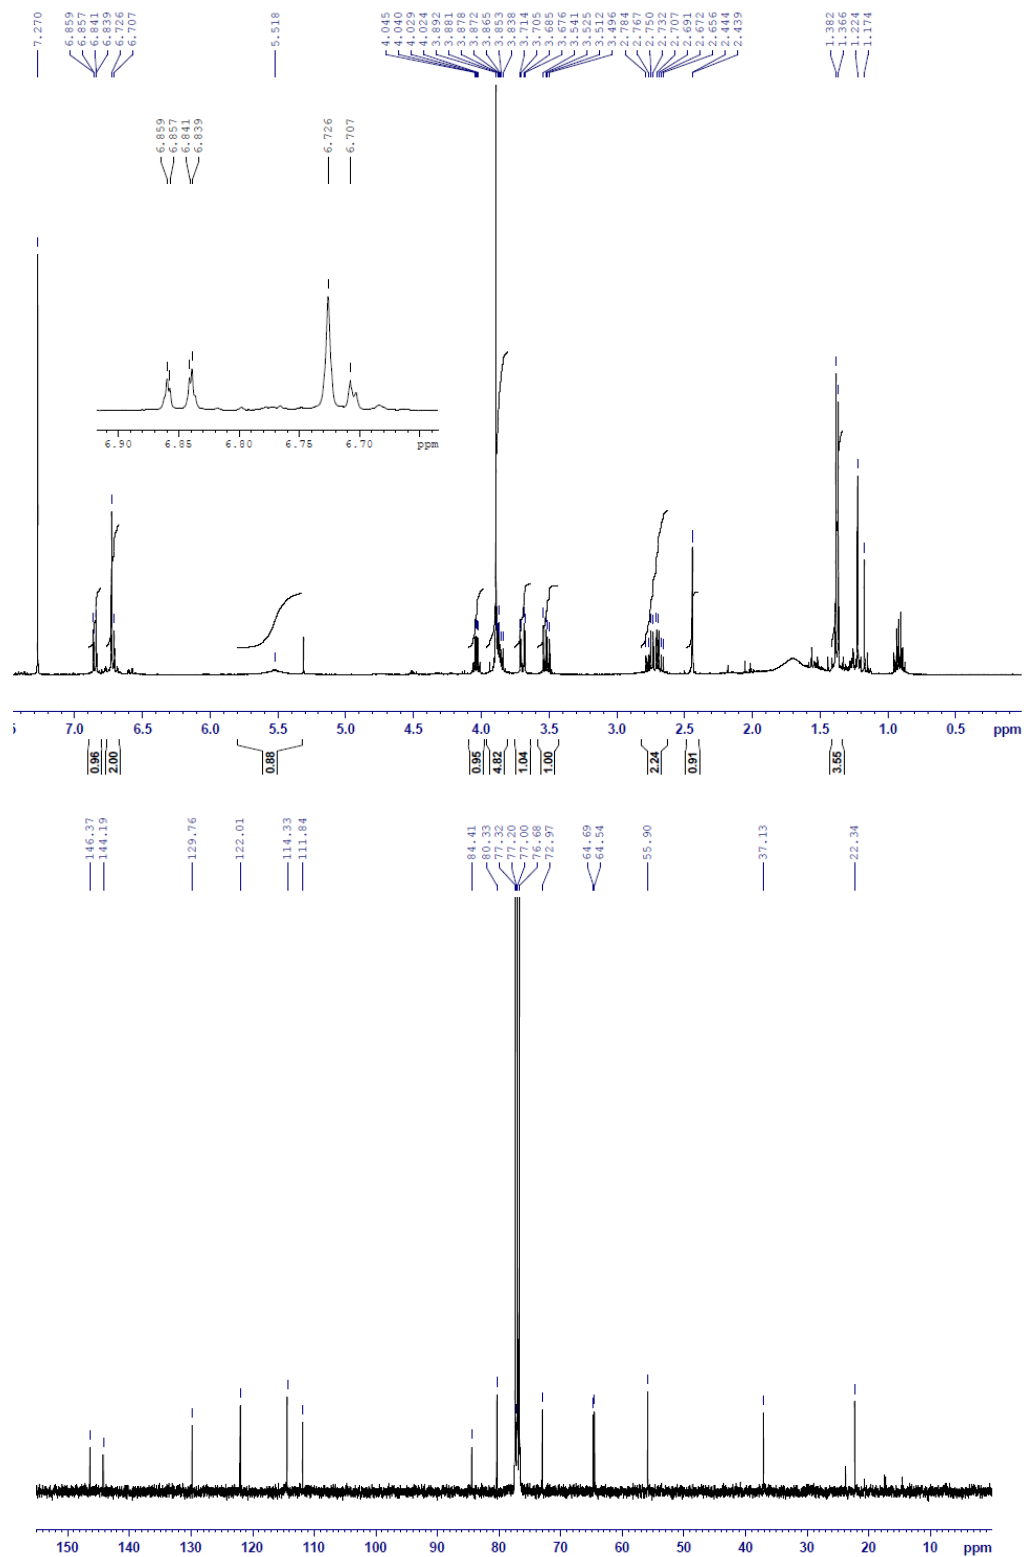

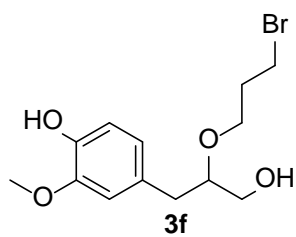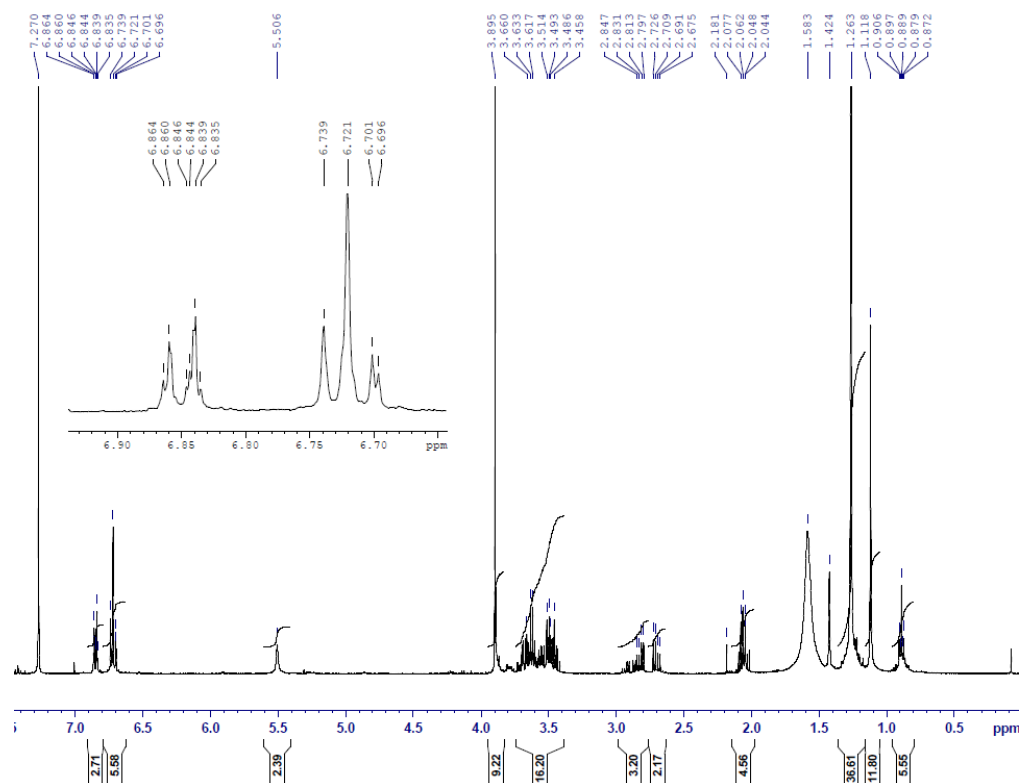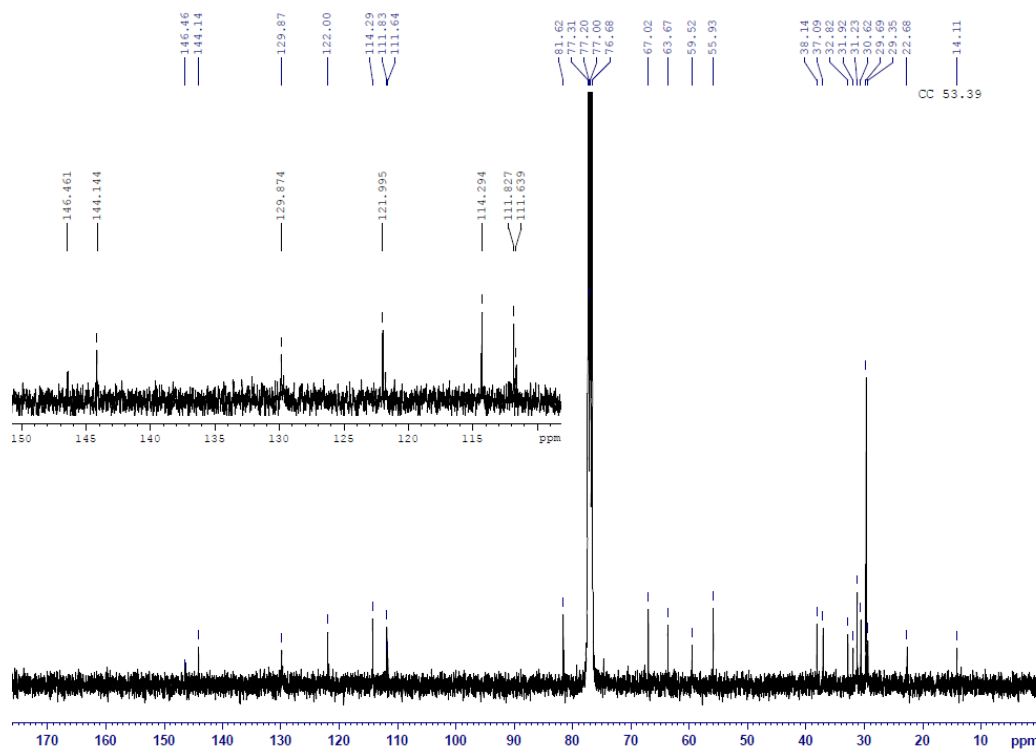

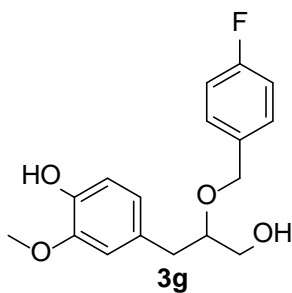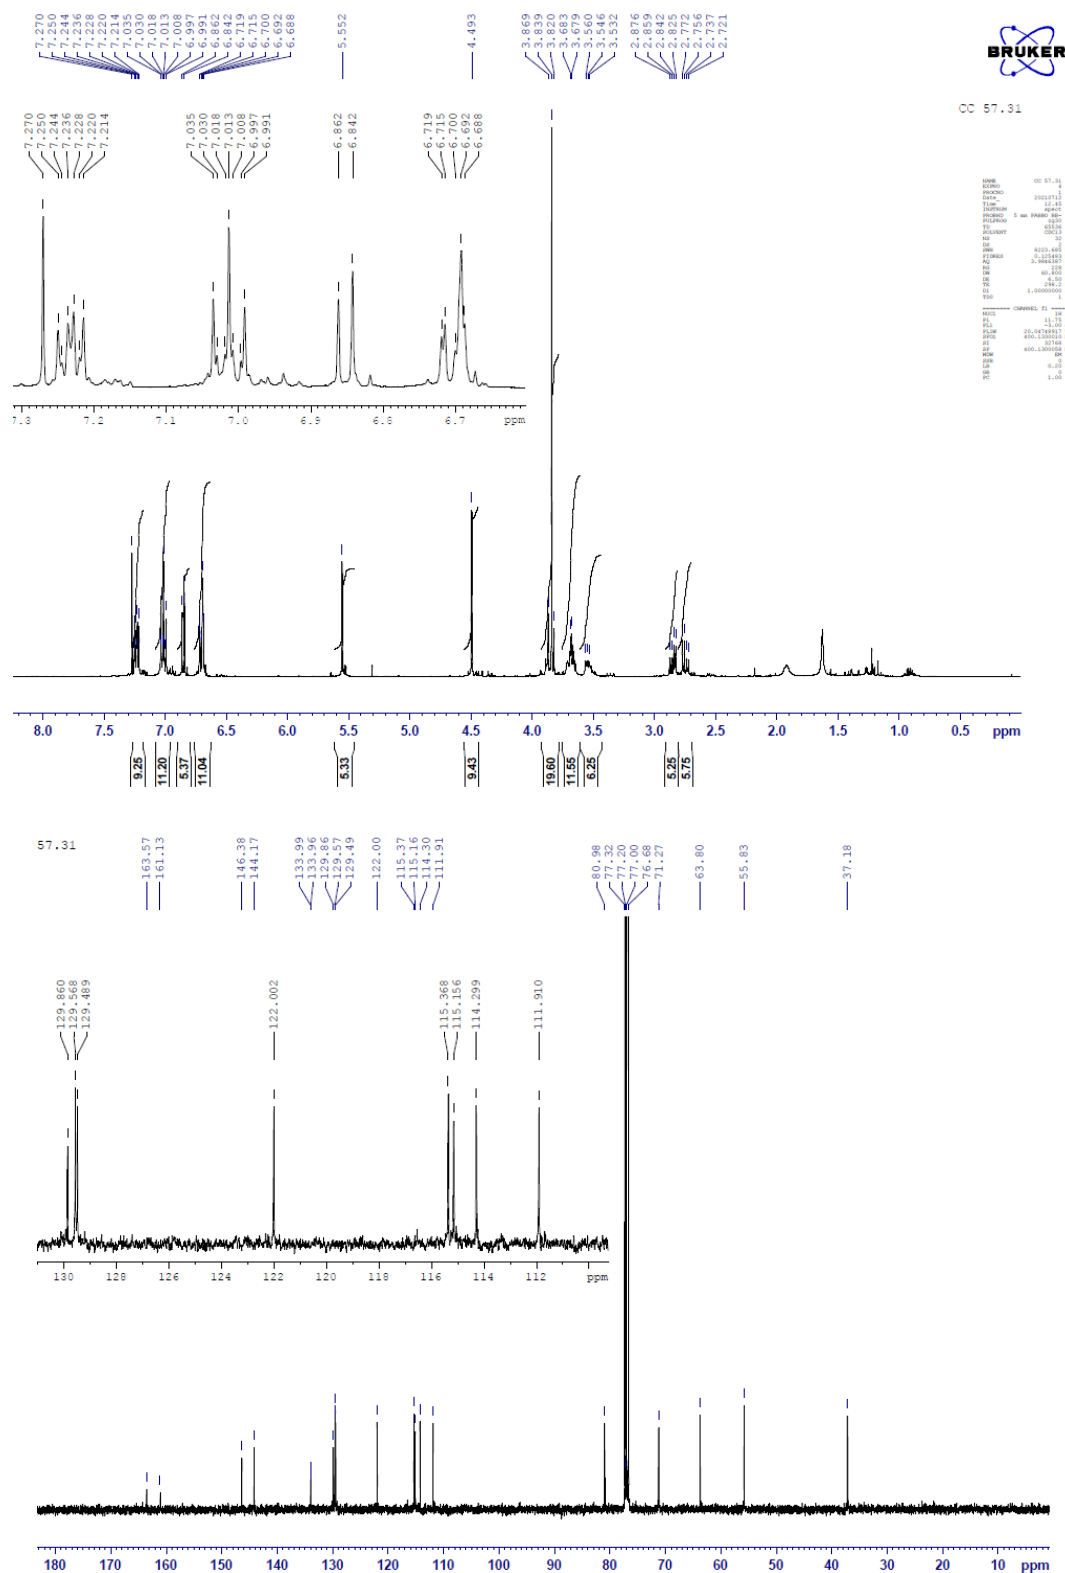

Supplement: Supplementary file 1 [file supplementary]
